# Supplementary material
Source: PubMed Central journal article supplement (PMC4793352)
Supplement: geoj014033.ww1_default.pdf [file geoj014033.ww1_default.pdf]

**Appendix 1: a stepwise analysis for the primary outcome**

A stepwise analysis with significant level of 0.3 to entry and 0.35 to stay showed that the adjusted exposure odds ratio (OR) for sodium- rich drug formulations was 1.164 (1.117 – 1.213) compared to standard formulations.

The correlation matrix for the analysis are shown in table below.

**Spearman Correlation Coefficients, N = 122144**

Prob > |r| under H0: Rho=0

|                                    | smoking            | bmi                | angina             | peripheral vascular disease | migraine           | diabetes           | chronic kidney disease | oesophageal disease | hypertension       | other cardiovascular drugs | ace/arb            | proton pump inhibitors | anti-psychotoc drugs | steroids           | nsaids             |
|------------------------------------|--------------------|--------------------|--------------------|-----------------------------|--------------------|--------------------|------------------------|---------------------|--------------------|----------------------------|--------------------|------------------------|----------------------|--------------------|--------------------|
| <b>smoking</b>                     | 1                  | -0.29108<br><.0001 | 0.07266<br><.0001  | 0.01935<br><.0001           | 0.02896<br><.0001  | 0.09207<br><.0001  | 0.11866<br><.0001      | 0.01345<br><.0001   | 0.07052<br><.0001  | 0.14527<br><.0001          | 0.18723<br><.0001  | 0.16095<br><.0001      | 0.02728<br><.0001    | 0.05125<br><.0001  | 0.13088<br><.0001  |
| <b>bmi</b>                         | -0.29108<br><.0001 | 1                  | -0.02001<br><.0001 | -0.02449<br><.0001          | -0.05007<br><.0001 | 0.00207<br><.0001  | -0.04387<br><.0001     | -0.0083<br><.0001   | -0.05143<br><.0001 | -0.03539<br><.0001         | -0.05595<br><.0001 | -0.10377<br><.0001     | -0.02593<br><.0001   | -0.03879<br><.0001 | -0.11533<br><.0001 |
| <b>angina</b>                      | 0.07266<br><.0001  | -0.02001<br><.0001 | 1                  | 0.06812<br><.0001           | 0.00691<br><.0001  | 0.08191<br><.0001  | 0.0454<br><.0001       | 0.00404<br><.0001   | -0.10637<br><.0001 | 0.26792<br><.0001          | 0.12161<br><.0001  | 0.06775<br><.0001      | 0.03598<br><.0001    | 0.00954<br><.0001  | 0.02012<br><.0001  |
| <b>peripheral vascular disease</b> | 0.01935<br><.0001  | -0.02449<br><.0001 | 0.06812<br><.0001  | 1                           | -0.00167<br><.0001 | 0.06834<br><.0001  | 0.04503<br><.0001      | 0.00212<br><.0001   | -0.00641<br><.0001 | 0.09431<br><.0001          | 0.05835<br><.0001  | 0.03254<br><.0001      | 0.00782<br><.0001    | 0.01096<br><.0001  | 0.01205<br><.0001  |
| <b>migraine</b>                    | 0.02896<br><.0001  | -0.05007<br><.0001 | 0.00691<br><.0001  | -0.00167<br><.0001          | 1                  | -0.01127<br><.0001 | -0.00386<br><.0001     | 0.00435<br><.0001   | -0.00607<br><.0001 | 0.0322<br><.0001           | 0.0111<br><.0001   | 0.05626<br><.0001      | 0.0722<br><.0001     | 0.01324<br><.0001  | 0.05826<br><.0001  |
| <b>diabetes</b>                    | 0.09207<br><.0001  | 0.00207<br><.0001  | 0.08191<br><.0001  | 0.06834<br><.0001           | -0.01127<br><.0001 | 1                  | 0.10057<br><.0001      | 0.00128<br><.0001   | 0.02695<br><.0001  | 0.15792<br><.0001          | 0.23398<br><.0001  | 0.04125<br><.0001      | 0.00598<br><.0001    | 0.00023<br><.0001  | 0.00978<br><.0001  |
| <b>chronic kidney disease</b>      | 0.11866<br><.0001  | -0.04387<br><.0001 | 0.0454<br><.0001   | 0.04503<br><.0001           | -0.00386<br><.0001 | 0.10057<br><.0001  | 1                      | 0.0035<br><.0001    | 0.0308<br><.0001   | 0.1458<br><.0001           | 0.25174<br><.0001  | 0.14505<br><.0001      | 0.04137<br><.0001    | 0.05258<br><.0001  | 0.03889<br><.0001  |
| <b>oesophageal disease</b>         | 0.01345<br><.0001  | -0.0083<br><.0001  | 0.00404<br><.0001  | 0.00212<br><.0001           | 0.00435<br><.0001  | 0.00128<br><.0001  | 0.0035<br><.0001       | 1                   | -0.00178<br><.0001 | 0.0121<br><.0001           | 0.00685<br><.0001  | 0.04233<br><.0001      | 0.00278<br><.0001    | 0.00811<br><.0001  | 0.00186<br><.0001  |
| <b>hypertension</b>                | 0.07052<br><.0001  | -0.05143<br><.0001 | -0.10637<br><.0001 | -0.00641<br><.0001          | -0.00607<br><.0001 | 0.02695<br><.0001  | 0.0308<br><.0001       | -0.00178<br><.0001  | 1                  | -0.06271<br><.0001         | 0.1424<br><.0001   | 0.01138<br><.0001      | -0.01649<br><.0001   | -0.01855<br><.0001 | 0.01418<br><.0001  |
| <b>other cardiovascular drugs</b>  | 0.14527<br><.0001  | -0.03539<br><.0001 | 0.26792<br><.0001  | 0.09431<br><.0001           | 0.0322<br><.0001   | 0.15792<br><.0001  | 0.1458<br><.0001       | 0.0121<br><.0001    | -0.06271<br><.0001 | 1                          | 0.31158<br><.0001  | 0.16864<br><.0001      | 0.1002<br><.0001     | 0.05336<br><.0001  | 0.04881<br><.0001  |
| <b>ace/arb</b>                     | 0.18723<br><.0001  | -0.05595<br><.0001 | 0.12161<br><.0001  | 0.05835<br><.0001           | 0.0111<br><.0001   | 0.23398<br><.0001  | 0.25174<br><.0001      | 0.00685<br><.0001   | 0.1424<br><.0001   | 0.31158<br><.0001          | 1                  | 0.1636<br><.0001       | 0.03201<br><.0001    | 0.04229<br><.0001  | 0.07328<br><.0001  |
| <b>proton pump inhibitors</b>      | 0.16095<br><.0001  | -0.10377<br><.0001 | 0.06775<br><.0001  | 0.03254<br><.0001           | 0.05626<br><.0001  | 0.04125<br><.0001  | 0.14505<br><.0001      | 0.04233<br><.0001   | 0.01138<br><.0001  | 0.16864<br><.0001          | 0.1636<br><.0001   | 1                      | 0.10576<br><.0001    | 0.1127<br><.0001   | 0.13231<br><.0001  |
| <b>anti-psychotoc drugs</b>        | 0.02728<br><.0001  | -0.02593<br><.0001 | 0.03598<br><.0001  | 0.00782<br><.0001           | 0.0722<br><.0001   | 0.00598<br><.0001  | 0.04137<br><.0001      | 0.00278<br><.0001   | -0.01649<br><.0001 | 0.1002<br><.0001           | 0.03201<br><.0001  | 0.10576<br><.0001      | 1                    | 0.04604<br><.0001  | 0.08104<br><.0001  |
| <b>steroids</b>                    | 0.05125<br><.0001  | -0.03879<br><.0001 | 0.00954<br><.0001  | 0.01096<br><.0001           | 0.01324<br><.0001  | 0.00023<br><.0001  | 0.05258<br><.0001      | 0.00811<br><.0001   | -0.01855<br><.0001 | 0.05336<br><.0001          | 0.04229<br><.0001  | 0.1127<br><.0001       | 0.04604<br><.0001    | 1                  | 0.05738<br><.0001  |
| <b>nsaids</b>                      | 0.13088<br><.0001  | -0.11533<br><.0001 | 0.02012<br><.0001  | 0.01205<br><.0001           | 0.05826<br><.0001  | 0.00978<br><.0001  | 0.03889<br><.0001      | 0.00186<br><.0001   | 0.01418<br><.0001  | 0.04881<br><.0001          | 0.07328<br><.0001  | 0.13231<br><.0001      | 0.08104<br><.0001    | 0.05738<br><.0001  | 1                  |
