# Supplementary material
Source: PubMed Central journal article supplement (PMC4793352)
Supplement: geoj014033.ww2_default.pdf [file geoj014033.ww2_default.pdf]

## Appendix 2: Multiple imputation and a complete case analysis

The factors used in the multiple imputation included outcome, age, gender, smoking status, BMI, hypertension, peripheral vascular disease, angina, chronic obstructive pulmonary disease (COPD), diabetes mellitus, chronic kidney disease, migraine, heart failure, oesophageal disease, potassium sparing diuretics, Angiotensin Converting Enzyme (ACE) inhibitors or Angiotensin Receptor Blockers (ARBs), other cardiovascular drugs, proton pump inhibitors, oral steroids, Anti-Inflammatory Non-Steroidal Drugs (NSAIDs) or COX-2 inhibitors and anti-psychotic medications.

A further analysis using only those patients without any missing data (n=68,224) showed that the adjusted HR was 1.20 (95%CI 1.12-1.27) which was similar to the main result. The baseline characteristics of patients in a complete case analysis are shown in table 1.

Table 1. Baseline characteristics

|                                    | <b>Cases<br/>N=34112</b> | <b>Controls<br/>N=34112</b> | <b>P value</b> |
|------------------------------------|--------------------------|-----------------------------|----------------|
| <b>Age (years, SD)</b>             | 67 (11.9)                | 67 (11.9)                   | -              |
| <b>Gender (Male)</b>               | 15177 (44.5%)            | 15177 (44.5%)               | -              |
| <b>BMI (kg/m<sup>2</sup>)</b>      |                          |                             |                |
| <18.5                              | 629 (1.8%)               | 597 (1.8%)                  | <0.01          |
| 18.5-24.9                          | 11411 (33.5%)            | 11705 (34.3%)               |                |
| 25-29.9                            | 13595 (39.9%)            | 13745 (40.3%)               |                |
| ≥30                                | 8477 (24.8%)             | 8065 (23.6%)                |                |
| <b>Smoking status</b>              |                          |                             |                |
| None                               | 7272 (21.3%)             | 5627 (16.5%)                | <0.01          |
| Current smoker                     | 16117 (47.3%)            | 18534 (54.3%)               |                |
| Ex-smoker                          | 10723 (31.4%)            | 9951 (29.2%)                |                |
| <b>Previous disease history</b>    |                          |                             |                |
| Angina                             | 6985 (20.5%)             | 4328 (12.7%)                | <0.01          |
| HF                                 | 2168 (6.4%)              | 1506 (4.4%)                 | <0.01          |
| PVD                                | 1485 (4.4%)              | 865 (2.5%)                  | <0.01          |
| Migraine                           | 2211 (6.5%)              | 1887 (5.5%)                 | <0.01          |
| Oesophageal disease                | 91 (0.27%)               | 62 (0.18%)                  | 0.02           |
| Diabetes                           | 6275 (18.4%)             | 4687 (13.7%)                | <0.01          |
| CKD                                | 3794 (11.1%)             | 3305 (9.7%)                 | <0.01          |
| COPD                               | 3788 (11.1%)             | 3194 (9.4%)                 | <0.01          |
| <b>Previous medication history</b> |                          |                             |                |
| CVD drugs                          | 26289 (77.1%)            | 20998 (61.6%)               | <0.01          |
| ACE/ARB                            | 14512 (42.5%)            | 11573 (33.9%)               | <0.01          |
| PPI                                | 14964 (43.9%)            | 13546 (39.7%)               | <0.01          |
| Potassium                          | 1576 (4.6%)              | 1168 (3.4%)                 | <0.01          |
| Anti-psychotic                     | 9785 (28.7%)             | 8743 (25.6%)                | <0.01          |
| HIV                                | 3 (0.0%)                 | 0 (0.0%)                    | --             |
| Steroids                           | 2814 (8.3%)              | 2404 (7.1%)                 | <0.01          |
| NSAIDs                             | 25549 (74.9%)            | 25988 (76.2%)               | <0.01          |
